# Supplementary material
Source: PubMed Central journal article supplement (PMC2835827)
Supplement: NIHMS177206-supplement-Figure.pdf [file NIHMS177206-supplement-Figure.pdf]

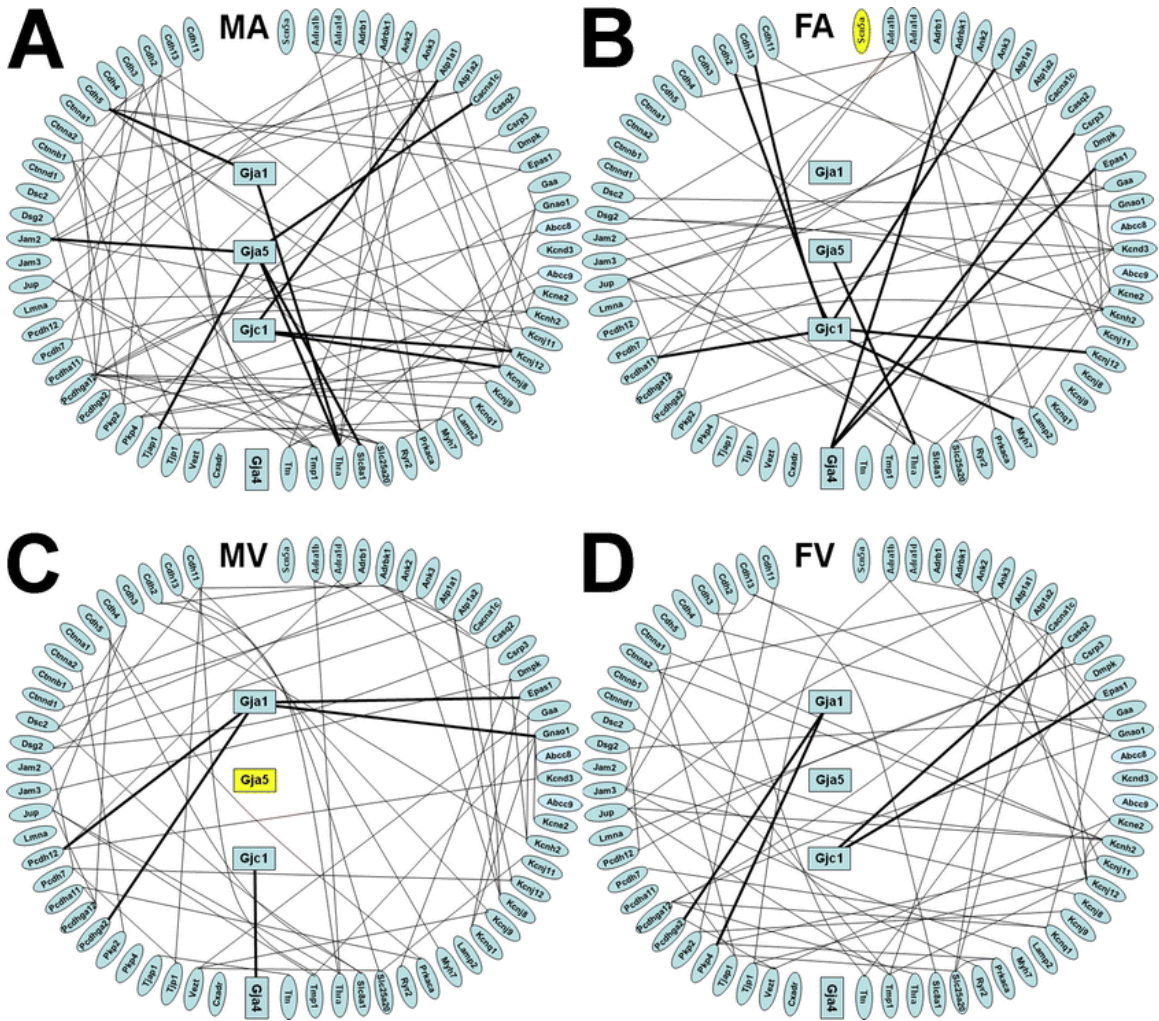

**Supplementary Figure 1** Independently expressed HRD gene pairs in atria and ventricles of adult male and female mice. Note the sex and chamber differences in the significant expression decoupling of the selected genes. Yellow background for Gja5 in male ventricles and Scn5a in female atria indicates that these genes were excluded from the analysis in the indicated samples.
